# Supplementary material
Source: PubMed Central journal article supplement (PMC4346353)
Supplement: NIHMS653369-supplement-125_2014_3470_MOESM1_ESM.pdf [file NIHMS653369-supplement-125_2014_3470_MOESM1_ESM.pdf]

**ESM Table 1.** Average blood glucose levels for animal studies

| Mouse groups from the insulin-study | Average blood glucose levels $\pm$ SEM (mmol/l) |
|-------------------------------------|-------------------------------------------------|
| Normoglycemic                       | 8.16 $\pm$ 0.18                                 |
| Diabetic                            | 27.19 $\pm$ 0.72                                |
| Diabetic + insulin-treated          | 5.99 $\pm$ 0.36                                 |

| Mouse groups from the pegsunercept-study | Average blood glucose levels $\pm$ SEM (mmol/l) |
|------------------------------------------|-------------------------------------------------|
| Normoglycemic + saline                   | 6.60 $\pm$ 0.42                                 |
| Normoglycemic + pegsunercept             | 5.94 $\pm$ 0.26                                 |
| Diabetic + saline                        | 27.86 $\pm$ 0.65                                |
| Diabetic + pegsunercept                  | 25.97 $\pm$ 0.91                                |
