# Supplementary material
Source: PubMed Central journal article supplement (PMC4346353)
Supplement: NIHMS653369-supplement-125_2014_3470_MOESM2_ESM.pdf [file NIHMS653369-supplement-125_2014_3470_MOESM2_ESM.pdf]

**ESM Table 2.** Antibodies and reagents

| Antibody/reagents                                                 | Dilution factor | Company                                     |
|-------------------------------------------------------------------|-----------------|---------------------------------------------|
| Rabbit anti-CD271 (p75-NGFR)                                      | 1:5000          | Abcam, Cambridge, UK                        |
| Rat anti-Sca-1                                                    | 1:100           | Abcam, Cambridge, UK                        |
| Rat anti-CD45                                                     | 1:100           | Novus Biologicals, CO, USA                  |
| Rabbit anti-CD45                                                  | 1:100           | Abcam, Cambridge, UK                        |
| Mouse anti-Ki67                                                   | 1:100           | Leica Biosystems, Newcastle, UK             |
| Mouse on Mouse fluorescein kit                                    |                 | Vector Labs, Burlingame, CA                 |
| Rabbit anti-FOXO1                                                 | 1:200           | Santa Cruz Technologies, Dallas, TX         |
| DeadEnd <sup>TM</sup> Fluorometric TUNEL system                   |                 | Promega, Madison, WI                        |
| Avidin-biotin peroxidase enzyme complex                           |                 | Vector Labs, Burlingame, CA                 |
| Tyramide signal amplification                                     |                 | PerkinElmer, Waltham, MA                    |
| Avidin/biotin blocking reagent                                    |                 | Vector Labs, Burlingame, CA                 |
| Avidin-fluorescein                                                |                 | Vector Labs, Burlingame, CA                 |
| Annexin V-biotin                                                  |                 | Life Technologies, Eugene, OR               |
| Rabbit anti-cleaved caspase-3                                     | 1:100           | Santa Cruz Biotechnology, Dallas, TX        |
| BrdU Cell Proliferation assay kit                                 |                 | Cell Signaling Technology, Danvers, MA      |
| Lipofectamine 2000                                                |                 | Life Technologies, Grand Island, NY         |
| On-target plus smartpool human <i>FOXO1</i> small interfering RNA |                 | Dharmacon, Thermo Scientific, Pittsburg, PA |
